# Supplementary material for: A fluorescent molecular rotor for the in situ imaging of latent fingerprints
Source: Royal Society of Chemistry journal article supplement (doi:10.1039/d2ra06728e), 2022-01-01

## Electronic Supporting Information

### A fluorescent molecular rotor for the *in situ* imaging of latent fingerprints

Na-Eun Choi, Eun-Ji Kim, and Jiyoun Lee \*

School of Biopharmaceutical and Medical Sciences, Sungshin University, Seoul 01133,

Republic of Korea

**Figure S1.** Normalized (a) absorbance and (b) emission spectra for **LFP-1** in various solvents

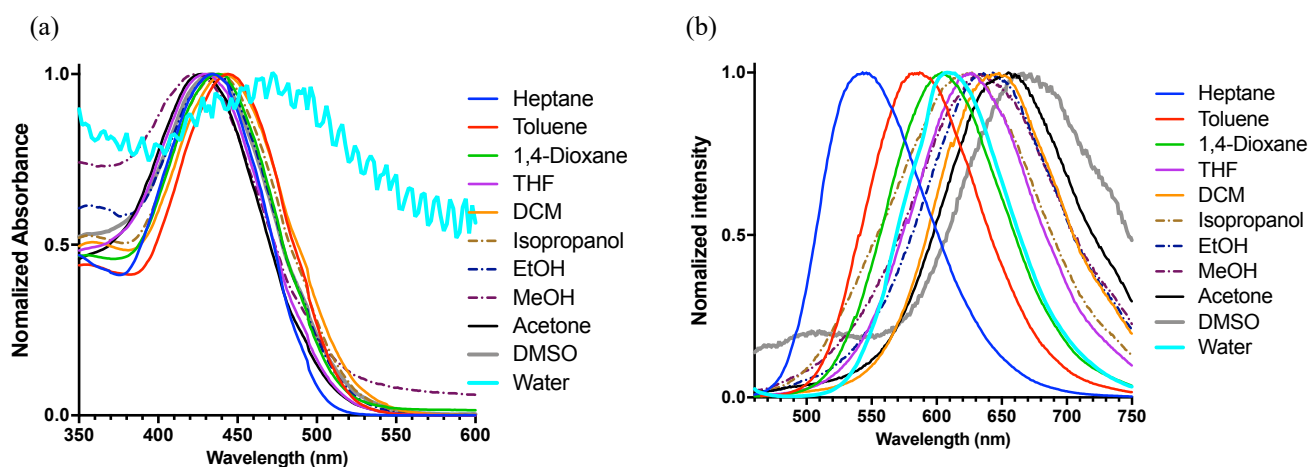

**Figure S2.** Changes in fluorescence signals and emission maxima in different fractions of heptane-THF mixtures (a), and heptane-corn oil mixtures.

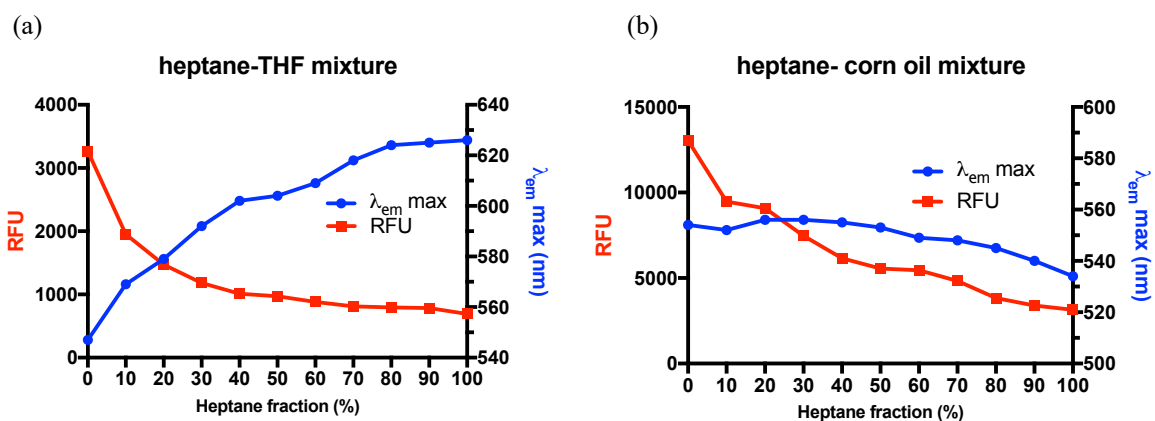

**Figure S3.** Cytotoxicity of LFP-1 tested in HeLa cells

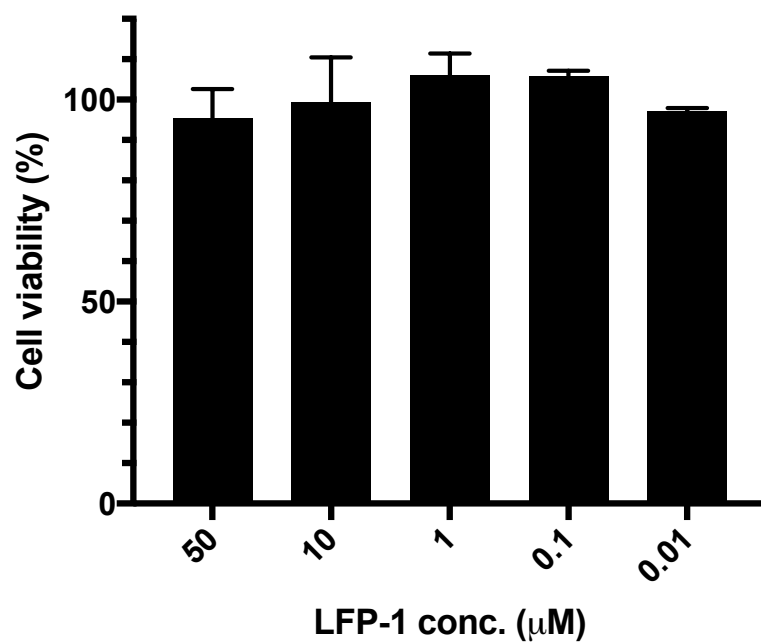

**Figure S4.** Photographs of fingerprints deposited on glass slides developed with aqueous LFP-1 at different concentrations.

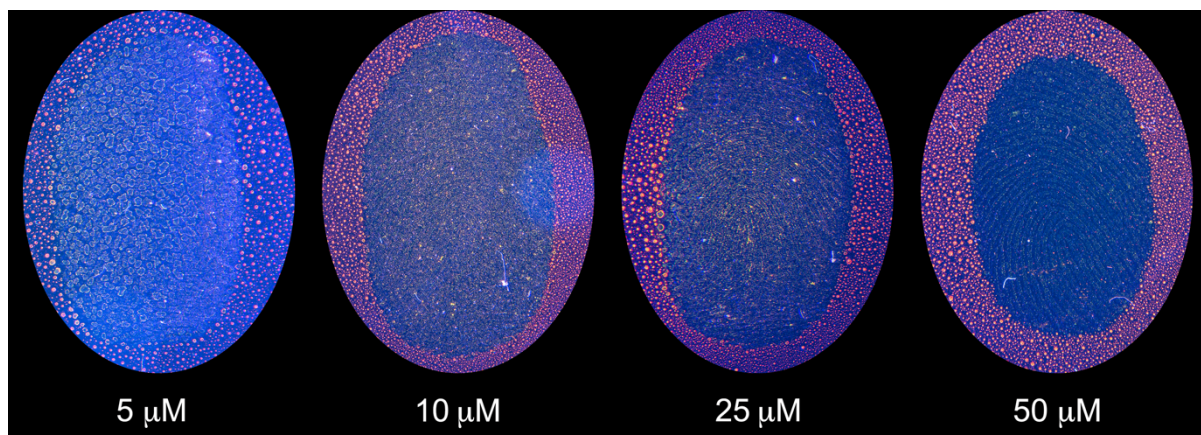

**Figure S5.** Spectroscopic analysis and latent fingerprint visualization of compound **2**. Absorbance (a) and emission (b) spectra of compound **2** (25  $\mu\text{M}$ ); (c) emission spectra of **2** in heptane/corn oil mixture; (d) digital picture of the latent fingerprint on a glass slide developed by spraying compound **2** under UV light (365 nm) illumination.

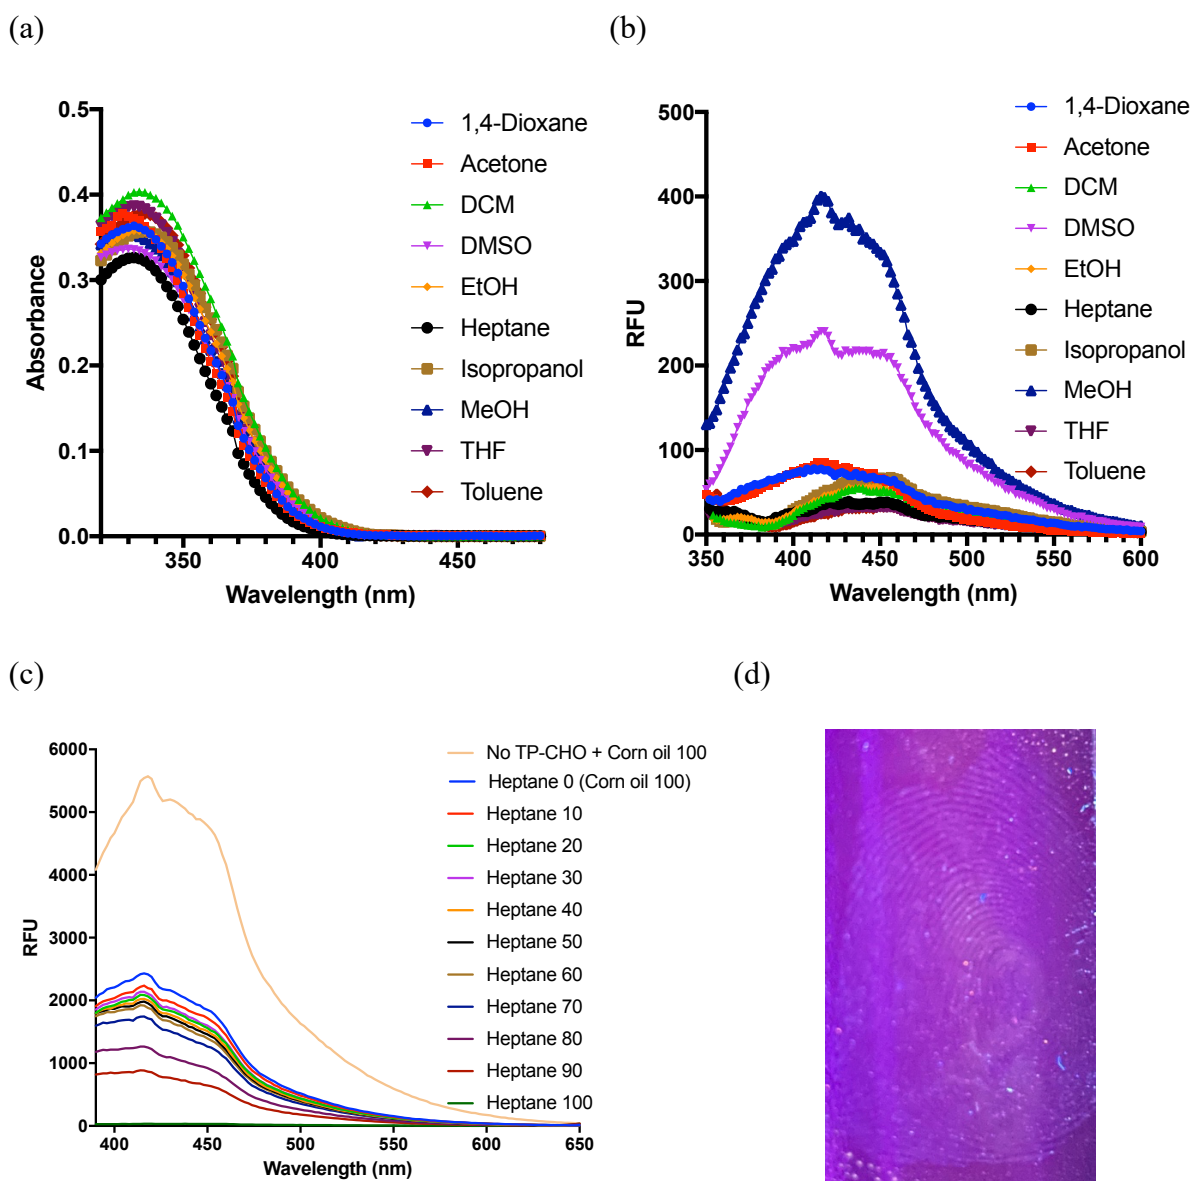



### <sup>13</sup>C NMR of LFP-1

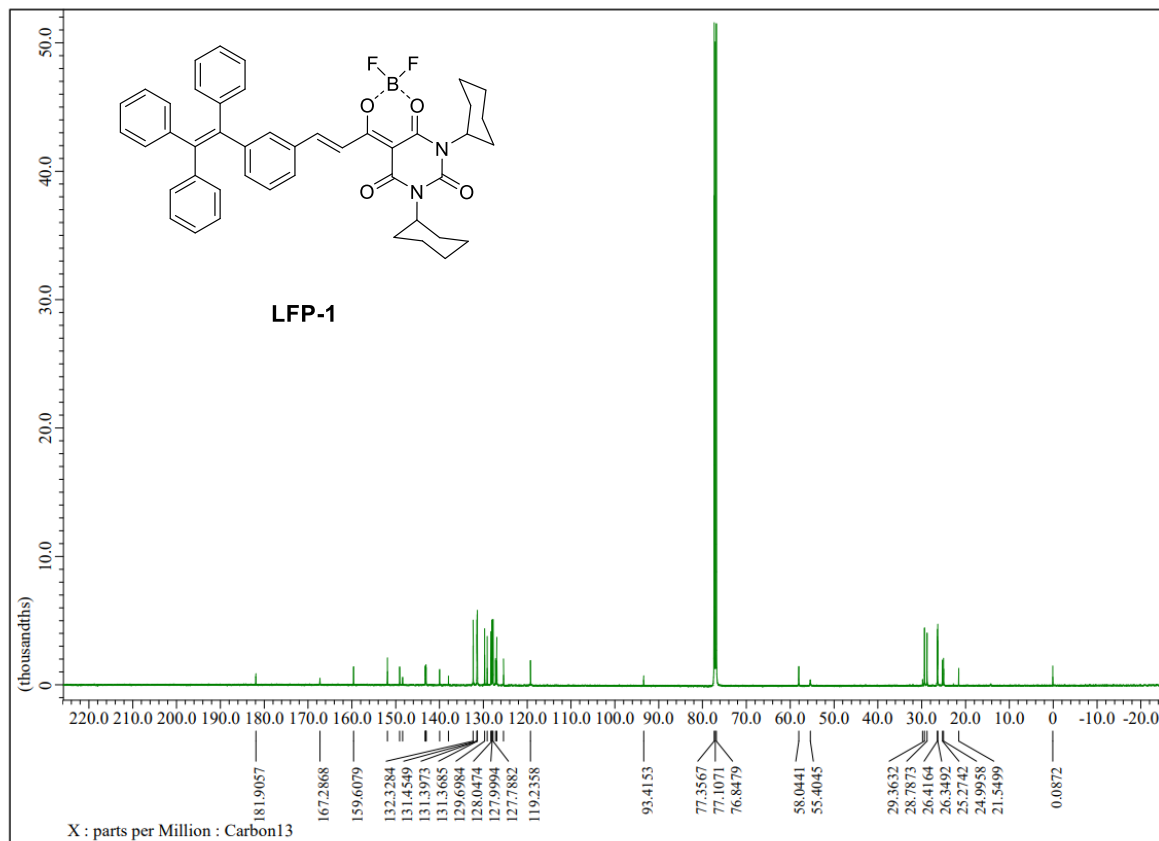

### <sup>19</sup>F NMR of LFP-1

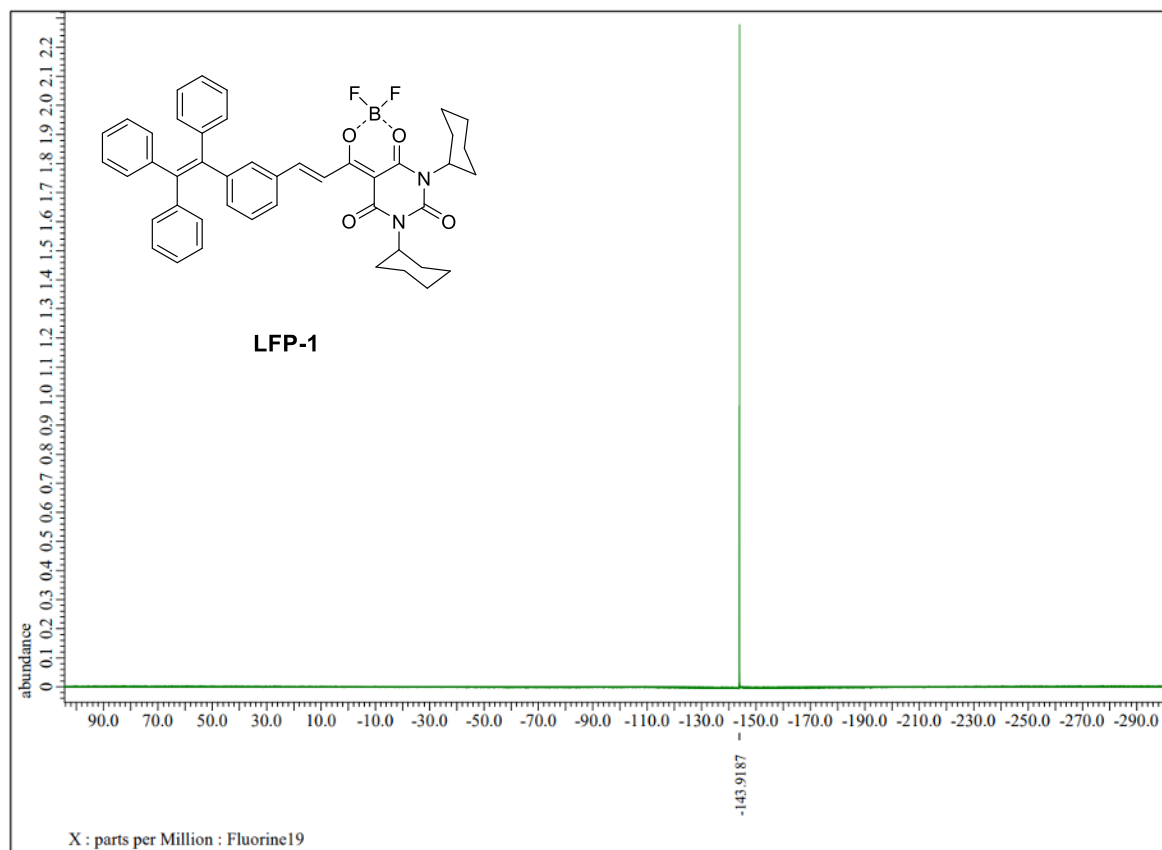

Supplement: d2ra06728e1.pdf [file d2ra06728e1.pdf]
